# Supplementary material for: Transcriptome Analysis Reveals the Impact of Arbuscular Mycorrhizal Symbiosis on Toona ciliata var. pubescens Seedlings
Source: MDPI journal article supplement (doi:10.3390/f15040673), 2024-04-08
Supplement: s1 [file s1]

**Table S1.** Go enrichment analysis of upregulated DEGs (adjusted P-value < 0.05)

| Term type          | NO. | GO accession | Description                                             | Corrected P Value | Protein number |
|--------------------|-----|--------------|---------------------------------------------------------|-------------------|----------------|
| Biological process | 1   | GO:0007264   | small GTPase mediated signal transduction               | 1.10E-07          | 186            |
|                    | 2   | GO:006509    | regulation of molecular function                        | 3.17E-05          | 152            |
|                    | 3   | GO:0051056   | regulation of small GTPase mediated signal transduction | 3.95E-05          | 35             |
|                    | 4   | GO:0050790   | regulation of catalytic activity                        | 4.71E-05          | 141            |
|                    | 5   | GO:0051641   | cellular localization                                   | 0.000131          | 626            |
|                    | 6   | GO:0033036   | macromolecule localization                              | 0.000469          | 624            |
|                    | 7   | GO:0043087   | regulation of GTPase activity                           | 0.000469          | 59             |
|                    | 8   | GO:0007266   | Rho protein signal transduction                         | 0.000469          | 18             |
|                    | 9   | GO:0035023   | regulation of Rho protein signal transduction           | 0.000469          | 18             |
|                    | 10  | GO:0051649   | establishment of localization in cell                   | 0.001253          | 584            |
|                    | 11  | GO:0051336   | regulation of hydrolase activity                        | 0.001483          | 77             |
|                    | 12  | GO:0007265   | Ras protein signal transduction                         | 0.001895          | 25             |
|                    | 13  | GO:0046578   | regulation of Ras protein signal transduction           | 0.001895          | 25             |
|                    | 14  | GO:0008104   | protein localization                                    | 0.003145          | 548            |
|                    | 15  | GO:0045184   | establishment of protein localization                   | 0.003437          | 523            |
|                    | 16  | GO:1902531   | regulation of intracellular signal transduction         | 0.004585          | 45             |
|                    | 17  | GO:0006470   | protein dephosphorylation                               | 0.009589          | 50             |
|                    | 18  | GO:0015031   | protein transport                                       | 0.009749          | 505            |
|                    | 19  | GO:0035556   | intracellular signal transduction                       | 0.009756          | 298            |

|    |                |                                          |          |     |
|----|----------------|------------------------------------------|----------|-----|
| 20 | GO:004690<br>7 | intracellular transport                  | 0.010529 | 509 |
| 21 | GO:000704<br>9 | cell cycle                               | 0.012566 | 301 |
| 22 | GO:000996<br>6 | regulation of signal transduction        | 0.025295 | 67  |
| 23 | GO:003336<br>5 | protein localization to organelle        | 0.025295 | 148 |
| 24 | GO:005125<br>8 | protein polymerization                   | 0.026491 | 91  |
| 25 | GO:002305<br>1 | regulation of signaling                  | 0.030259 | 69  |
| 26 | GO:003461<br>3 | cellular protein localization            | 0.030259 | 449 |
| 27 | GO:007072<br>7 | cellular macromolecule localization      | 0.030259 | 449 |
| 28 | GO:000177<br>5 | cell activation                          | 0.030259 | 70  |
| 29 | GO:003250<br>5 | reproduction of a single-celled organism | 0.030939 | 61  |
| 30 | GO:003016<br>8 | platelet activation                      | 0.030939 | 64  |
| 31 | GO:000639<br>7 | mRNA processing                          | 0.032502 | 123 |
| 32 | GO:001607<br>1 | mRNA metabolic process                   | 0.032502 | 141 |
| 33 | GO:000091<br>7 | barrier septum assembly                  | 0.032502 | 63  |
| 34 | GO:003250<br>6 | cytokinetic process                      | 0.032502 | 63  |
| 35 | GO:009052<br>9 | cell septum assembly                     | 0.032502 | 63  |
| 36 | GO:190241<br>0 | mitotic cytokinetic process              | 0.032502 | 63  |
| 37 | GO:000027<br>8 | mitotic cell cycle                       | 0.032502 | 125 |
| 38 | GO:190304<br>7 | mitotic cell cycle process               | 0.032502 | 125 |
| 39 | GO:001064<br>6 | regulation of cell communication         | 0.033484 | 68  |
| 40 | GO:190258<br>2 | single-organism intracellular transport  | 0.035609 | 274 |
| 41 | GO:000691<br>3 | nucleocytoplasmic transport              | 0.042165 | 71  |

|                       |    |            |                                                |          |      |
|-----------------------|----|------------|------------------------------------------------|----------|------|
|                       | 42 | GO:0000281 | mitotic cytokinesis                            | 0.042165 | 64   |
|                       | 43 | GO:0061640 | cytoskeleton-dependent cytokinesis             | 0.042165 | 64   |
|                       | 44 | GO:0007596 | blood coagulation                              | 0.044018 | 65   |
|                       | 45 | GO:1902580 | single-organism cellular localization          | 0.044754 | 153  |
|                       | 46 | GO:0048870 | cell motility                                  | 0.046942 | 83   |
|                       | 47 | GO:0051674 | localization of cell                           | 0.046942 | 83   |
| Cellular<br>component | 1  | GO:0044422 | organelle part                                 | 0.000469 | 1307 |
|                       | 2  | GO:0044446 | intracellular organelle part                   | 0.000472 | 1298 |
|                       | 3  | GO:0031974 | membrane-enclosed lumen                        | 0.000518 | 405  |
|                       | 4  | GO:0005654 | nucleoplasm                                    | 0.000664 | 187  |
|                       | 5  | GO:0044451 | nucleoplasm part                               | 0.000664 | 187  |
|                       | 6  | GO:0043233 | organelle lumen                                | 0.001659 | 399  |
|                       | 7  | GO:0070013 | intracellular organelle lumen                  | 0.001659 | 399  |
|                       | 8  | GO:0031981 | nuclear lumen                                  | 0.003079 | 379  |
|                       | 9  | GO:0044428 | nuclear part                                   | 0.005163 | 550  |
|                       | 10 | GO:0000428 | DNA-directed RNA polymerase complex            | 0.011971 | 81   |
|                       | 11 | GO:0055029 | nuclear DNA-directed RNA polymerase complex    | 0.011971 | 81   |
|                       | 12 | GO:0016591 | DNA-directed RNA polymerase II, holoenzyme     | 0.015103 | 76   |
|                       | 13 | GO:0044430 | cytoskeletal part                              | 0.020102 | 280  |
|                       | 14 | GO:0005856 | cytoskeleton                                   | 0.020102 | 290  |
|                       | 15 | GO:0090575 | RNA polymerase II transcription factor complex | 0.030259 | 63   |
|                       | 16 | GO:0043231 | intracellular membrane-bounded organelle       | 0.030259 | 1618 |

|                       |    |                |                                                                                                             |          |      |
|-----------------------|----|----------------|-------------------------------------------------------------------------------------------------------------|----------|------|
|                       | 17 | GO:000557<br>7 | fibrinogen complex                                                                                          | 0.030939 | 64   |
|                       | 18 | GO:004322<br>7 | membrane-bounded organelle                                                                                  | 0.031324 | 1619 |
|                       | 19 | GO:000931<br>8 | exodeoxyribonuclease VII complex                                                                            | 0.036221 | 49   |
|                       | 20 | GO:003151<br>4 | motile cilium                                                                                               | 0.044386 | 53   |
| Molecular<br>function | 1  | GO:001642<br>3 | tRNA (guanine) methyltransferase activity                                                                   | 2.91E-05 | 66   |
|                       | 2  | GO:000817<br>6 | tRNA (guanine-N7-)-methyltransferase activity                                                               | 4.09E-05 | 56   |
|                       | 3  | GO:000817<br>5 | tRNA methyltransferase activity                                                                             | 5.15E-05 | 73   |
|                       | 4  | GO:000509<br>6 | GTPase activator activity                                                                                   | 0.001633 | 50   |
|                       | 5  | GO:003509<br>1 | phosphatidylinositol binding                                                                                | 0.00209  | 34   |
|                       | 6  | GO:000804<br>7 | enzyme activator activity                                                                                   | 0.004002 | 69   |
|                       | 7  | GO:000508<br>5 | guanyl-nucleotide exchange factor activity                                                                  | 0.004075 | 45   |
|                       | 8  | GO:003069<br>5 | GTPase regulator activity                                                                                   | 0.005717 | 55   |
|                       | 9  | GO:000828<br>9 | lipid binding                                                                                               | 0.011733 | 111  |
|                       | 10 | GO:006058<br>9 | nucleoside-triphosphatase regulator activity                                                                | 0.019029 | 96   |
|                       | 11 | GO:000813<br>8 | protein tyrosine/serine/threonine phosphatase activity                                                      | 0.019029 | 30   |
|                       | 12 | GO:000472<br>1 | phosphoprotein phosphatase activity                                                                         | 0.028217 | 39   |
|                       | 13 | GO:000551<br>5 | protein binding                                                                                             | 0.030939 | 2455 |
|                       | 14 | GO:001679<br>6 | exonuclease activity, active with either ribo- or deoxyribonucleic acids and producing 5'-phosphomonoesters | 0.032502 | 62   |
|                       | 15 | GO:000885<br>5 | exodeoxyribonuclease VII activity                                                                           | 0.036221 | 49   |
|                       | 16 | GO:000452<br>7 | exonuclease activity                                                                                        | 0.036221 | 83   |
|                       | 17 | GO:004573<br>5 | nutrient reservoir activity                                                                                 | 0.036637 | 26   |
|                       | 18 | GO:000554      | phospholipid binding                                                                                        | 0.040345 | 52   |

|    |           |                                          |          |     |  |
|----|-----------|------------------------------------------|----------|-----|--|
|    | 3         |                                          |          |     |  |
| 19 | GO:000875 | S-adenosylmethionine-dependent           | 0.04293  | 116 |  |
|    | 7         | methyltransferase activity               |          |     |  |
| 20 | GO:000452 | exodeoxyribonuclease activity            | 0.044018 | 51  |  |
|    | 9         |                                          |          |     |  |
| 21 | GO:001689 | exodeoxyribonuclease activity, producing | 0.044018 | 51  |  |
|    | 5         | 5'-phosphomonoesters                     |          |     |  |
| 22 | GO:000817 | RNA methyltransferase activity           | 0.048527 | 79  |  |
|    | 3         |                                          |          |     |  |

---
